# Supplementary material for: In-depth structural characterization of the influence of Li+ excess on spherical, Co-free layered LiMn0.5Ni0.5O2 cathode material using correlative Raman–SEM microscopy
Source: Royal Society of Chemistry journal article supplement (doi:10.1039/d2ta05957f), 2023-01-01
Supplement: d2ta05957f1.pdf [file d2ta05957f1.pdf]

## Electronic Supporting Information (ESI)

### In-depth structural characterization of the influence of Li<sup>+</sup> excess on spherical, Co-free layered LiMn<sub>0.5</sub>Ni<sub>0.5</sub>O<sub>2</sub> cathode material using correlative Raman-SEM microscopy

Florian Klein,<sup>a</sup> Claudia Pfeifer,<sup>a</sup> Philipp Scheitenberger,<sup>b</sup> Lukas Pfeiffer,<sup>a</sup> Dominik Zimmer,<sup>c</sup> Margret Wohlfahrt-Mehrens,<sup>a</sup> Mika Lindén<sup>\*,b</sup> and Peter Axmann<sup>\*,a</sup>

<sup>a</sup>Zentrum für Sonnenenergie- und Wasserstoffforschung Baden-Württemberg (ZSW),  
Helmholtzstrasse 8, D-89081 Ulm (Germany).  
e-mail: peter.axmann@zsw-bw.de

<sup>b</sup>Institute for Inorganic Chemistry II, Ulm University,  
Albert-Einstein-Allee 11, D-89081 Ulm (Germany).  
e-mail: mika.linden@zsw-bw.de

<sup>c</sup>Oxford Instruments GmbH,  
Borsigstr. 15A, 65205 Wiesbaden (Germany)

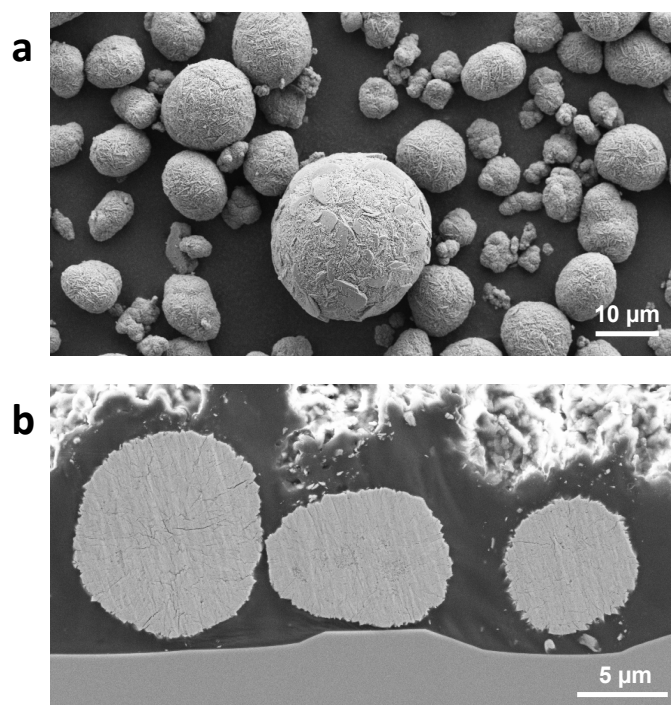

**Figure S1.** SEM images of the (Mn<sub>0.5</sub>Ni<sub>0.5</sub>)(OH)<sub>2</sub> precursor: a) top view of spherical particle morphology and b) particle cross-section of dense spheres.

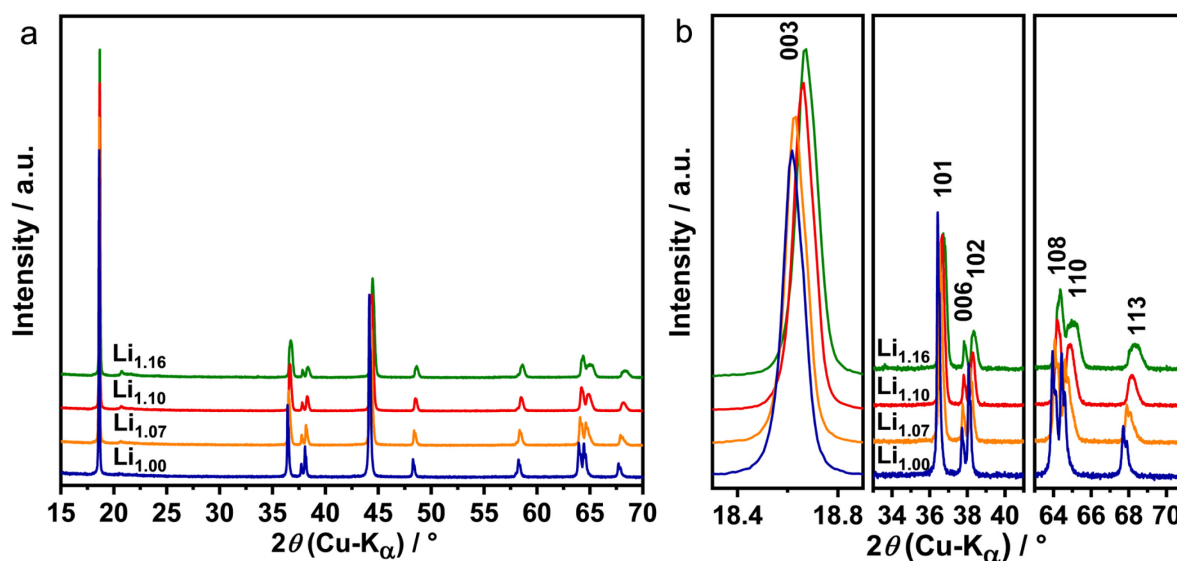

**Figure S2.** XRD pattern of  $\text{Li}_{1.00}$  (blue),  $\text{Li}_{1.07}$  (orange),  $\text{Li}_{1.10}$  (red) and  $\text{Li}_{1.16}$  (green): a) overview and b) details of selected reflections.

**Table S1.** Calculated Rietveld refinement parameters based on the structural model for  $\text{LiMn}_{0.5}\text{Ni}_{0.5}\text{O}_2$  of Bréger *et al.*<sup>1</sup>: space group, lattice parameters, Cell Volume  $V$ , cation occupancies, atom coordinate  $z$  of the oxide ions, the estimated crystallite size (integral breadth) and the  $R$  factor.

|                                                           | $\text{Li}_{1.00}$ | $\text{Li}_{1.07}$ | $\text{Li}_{1.10}$ | $\text{Li}_{1.16}$ |
|-----------------------------------------------------------|--------------------|--------------------|--------------------|--------------------|
| <b>Space group</b>                                        | $R\bar{3}m$ (166)  | $R\bar{3}m$ (166)  | $R\bar{3}m$ (166)  | $R\bar{3}m$ (166)  |
| <b><math>a</math> / Å</b>                                 | 2.890              | 2.880              | 2.874              | 2.867              |
| <b><math>c</math> / Å</b>                                 | 14.306             | 14.289             | 14.272             | 14.255             |
| <b><math>V</math> / Å<sup>3</sup></b>                     | 103.5              | 102.6              | 102.1              | 101.5              |
| <b><math>\text{Li}_{\text{Li}}</math> (3a: 0, 0, 0)</b>   | 0.91               | 0.92               | 0.93               | 0.94               |
| <b><math>\text{Ni}_{\text{Li}}</math> (3a: 0, 0, 0)</b>   | 0.09               | 0.08               | 0.07               | 0.06               |
| <b><math>\text{Li}_{\text{TM}}</math> (3b: 0, 0, 1/2)</b> | 0.09               | 0.08               | 0.07               | 0.06               |
| <b><math>\text{Mn}_{\text{TM}}</math> (3b: 0, 0, 1/2)</b> | 0.50               | 0.50               | 0.50               | 0.50               |
| <b><math>\text{Ni}_{\text{TM}}</math> (3b: 0, 0, 1/2)</b> | 0.41               | 0.42               | 0.43               | 0.44               |
| <b><math>z</math> [O (6c: 0, 0, <math>z</math>)]</b>      | 0.242              | 0.243              | 0.243              | 0.243              |
| <b>Crystallite Size / nm</b>                              | 149                | 385                | 284                | 293                |
| <b><math>R_{\text{wp}}</math> / %</b>                     | 5.8                | 5.9                | 4.6                | 5.3                |

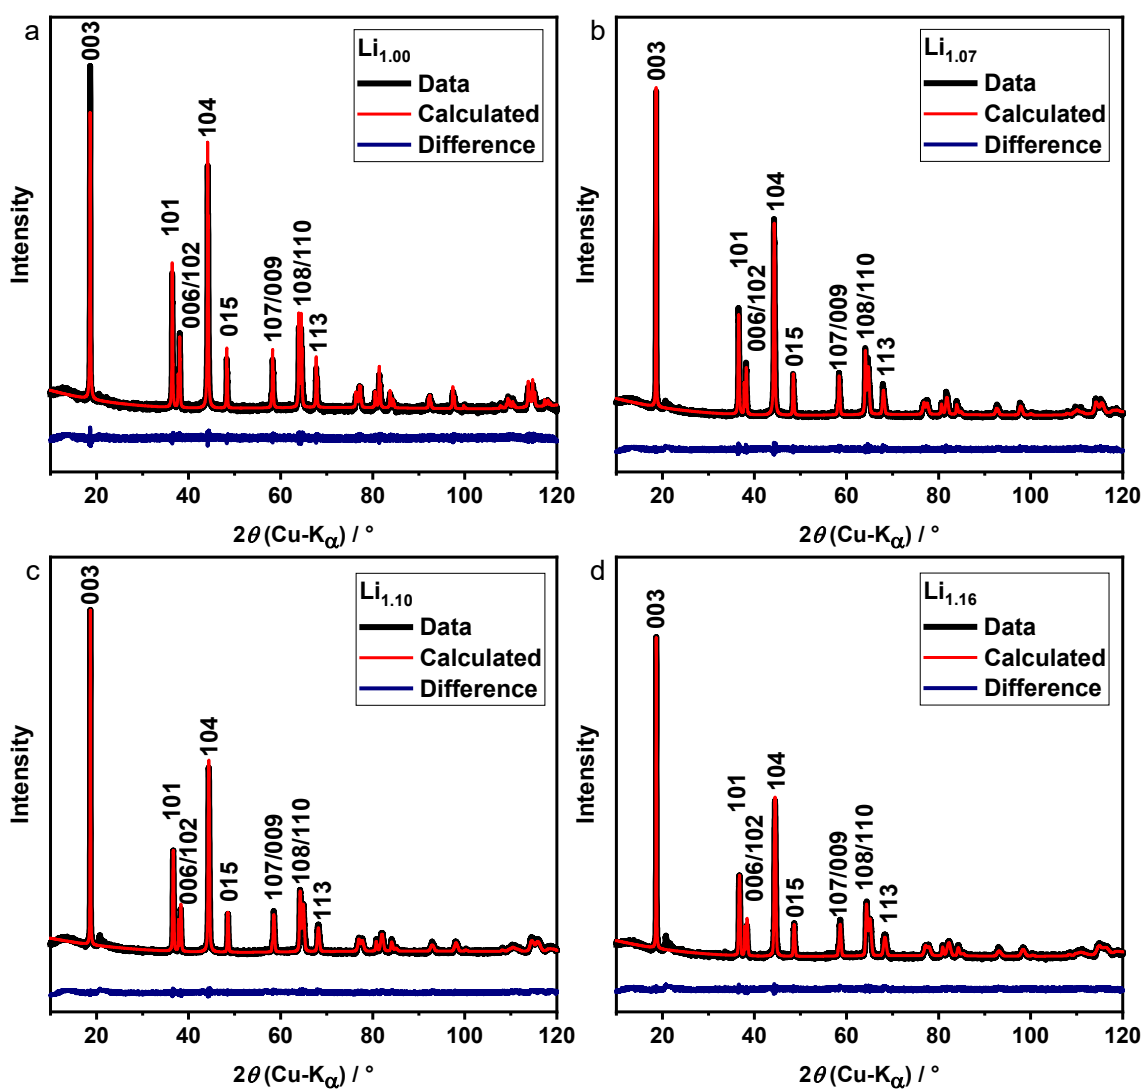

**Figure S3.** XRD pattern (black) of a)  $\text{Li}_{1.00}$ , b)  $\text{Li}_{1.07}$ , c)  $\text{Li}_{1.10}$  and d)  $\text{Li}_{1.16}$  in comparison with the calculated pattern from Rietveld refinement (red) and the difference between both (blue).

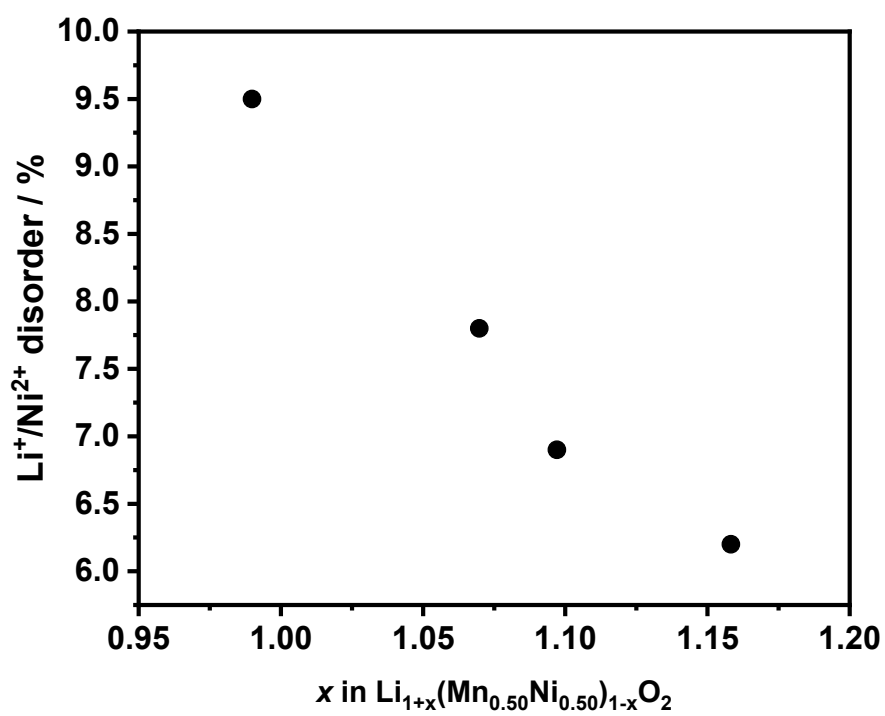

**Figure S4.** Li/Ni disorder as a function of the amount of excess  $\text{Li}^+$  in the structure determined via Rietveld refinement.

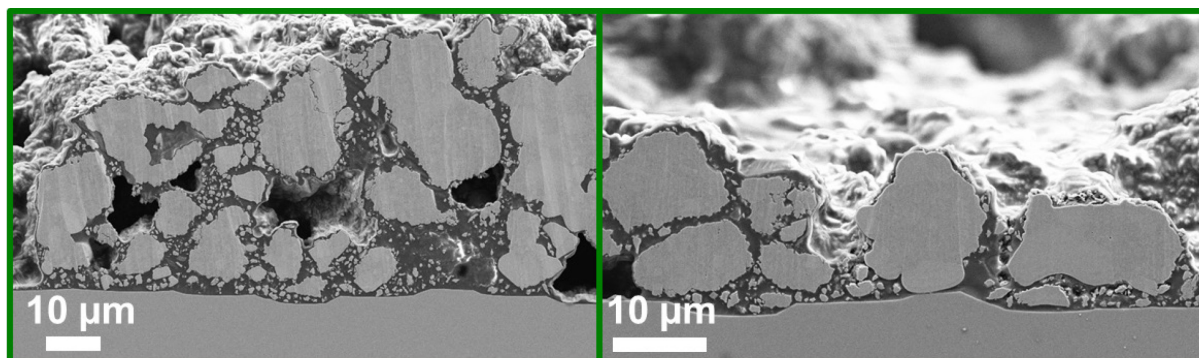

**Figure S5.** Overview SEM images of  $\text{Li}_{1.16}$  particle cross section showing an irregular morphology and the local phase separation.

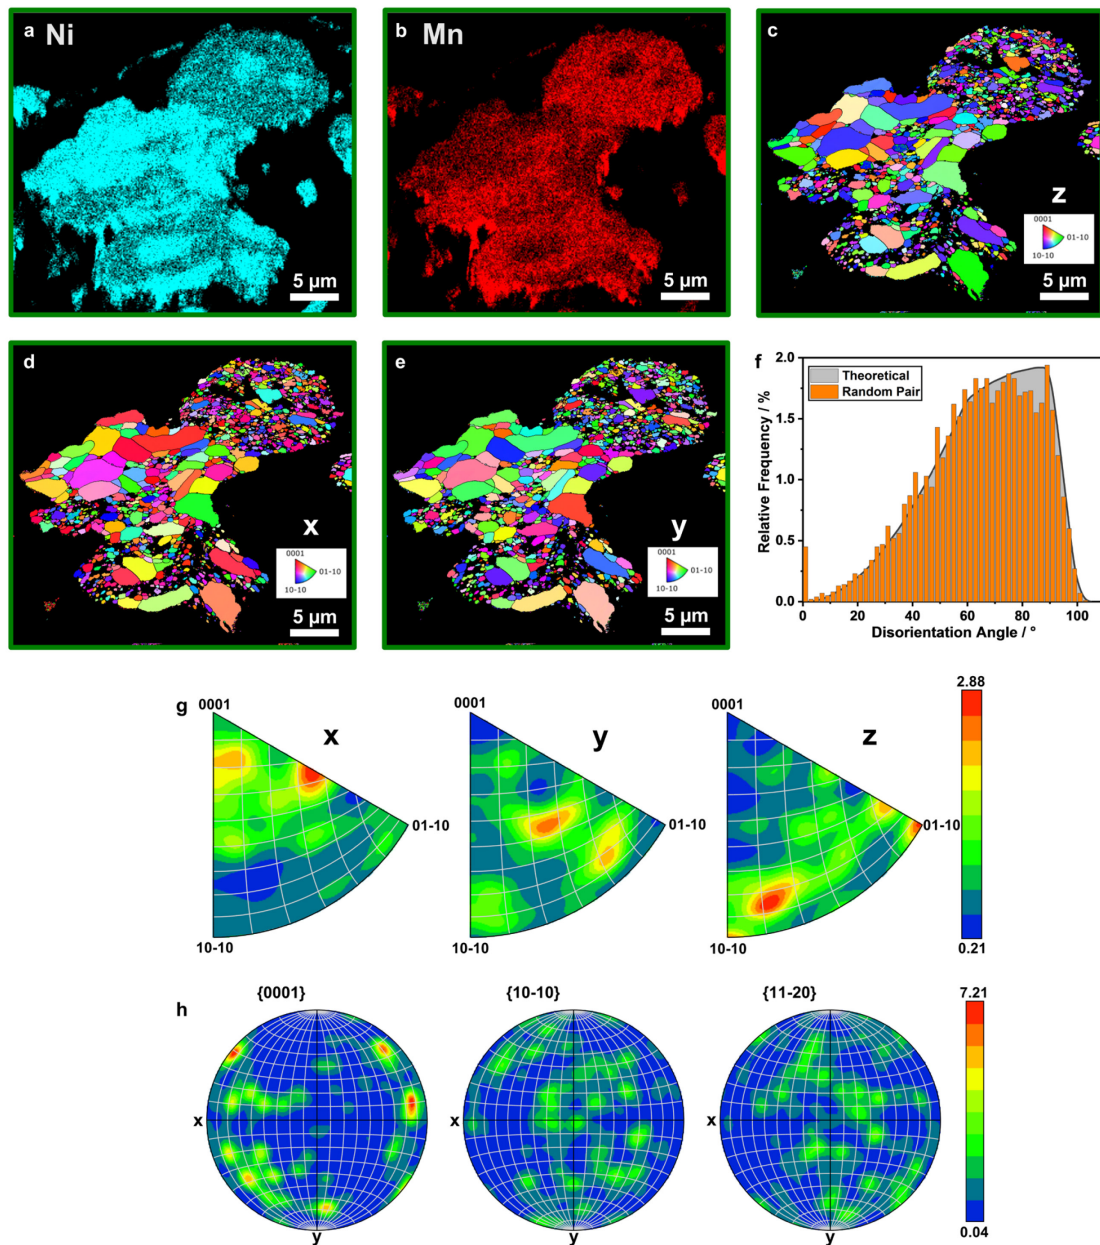

**Figure S6.** EBSD results of  $\text{Li}_{1.16}$ : EDX mapping of a) Ni and b) Mn, orientation distribution maps with inverse pole figure color key in direction c) Z, d) X and e) Y with respect to the acquisition system. The specimen is located in the X-Y plane and is oriented perpendicularly to the Z-axis. Furthermore, g) the inverse pole figures for the three directions X, Y and Z and h) pole figures for the families  $\{0001\}$ ,  $\{10-10\}$  and  $\{11-20\}$  indicating both no significant preferred crystallographic orientation of the crystallites. This is confirmed by f) the correlation of the Mackenzie plot (grey) with the random pair distribution (orange) of 99% and an M-index of 0.1, where a M-index of 1 represents a single crystal and a value of 0 represents a purely random orientation distribution.<sup>2</sup>

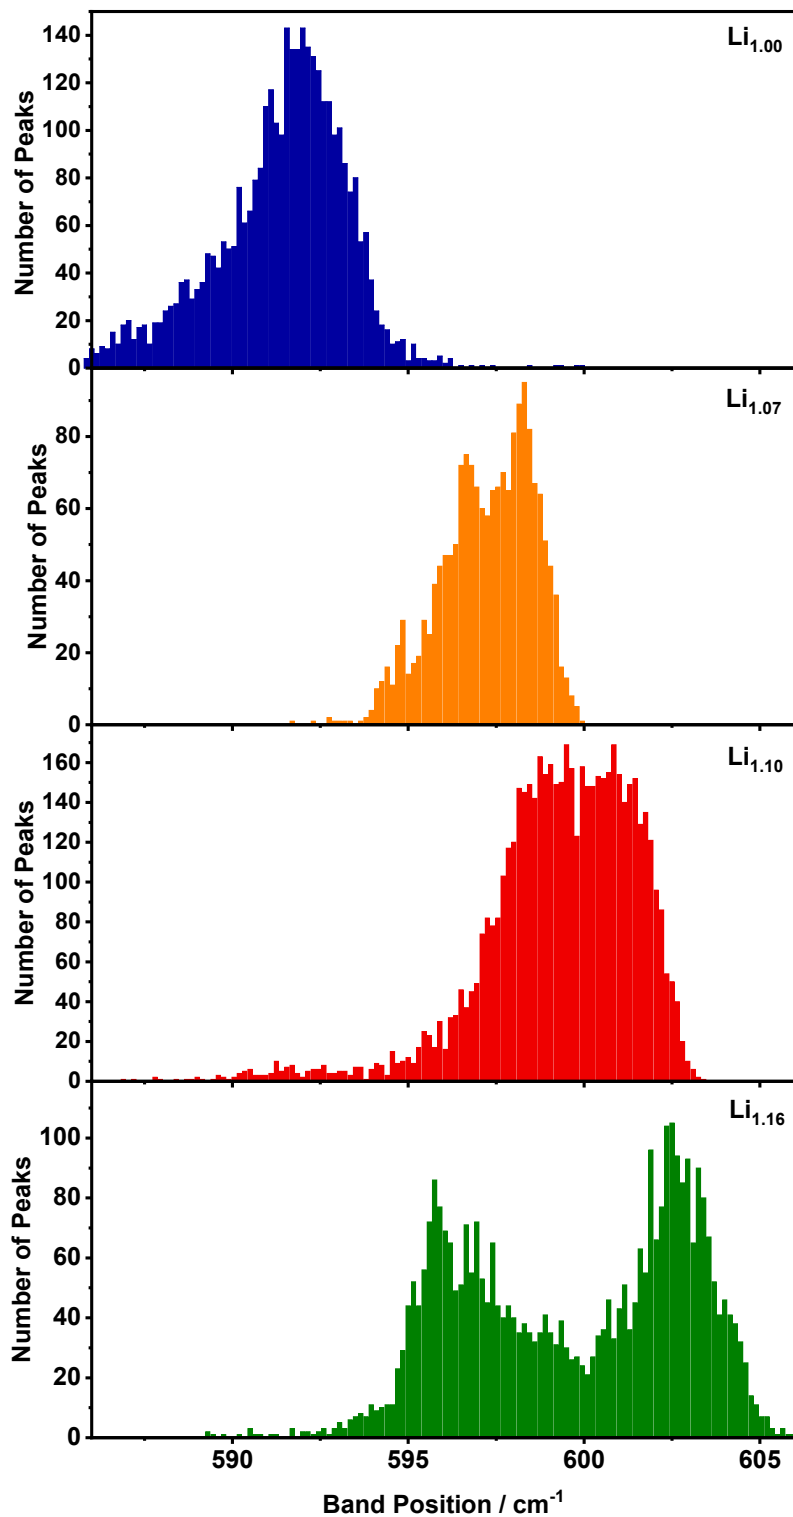

**Figure S7.** Histograms of the fitted position of the Raman vibration band at approximately 600 cm<sup>-1</sup> of Li<sub>1.00</sub> (blue), Li<sub>1.07</sub> (orange), Li<sub>1.10</sub> (red) and Li<sub>1.16</sub> (green).

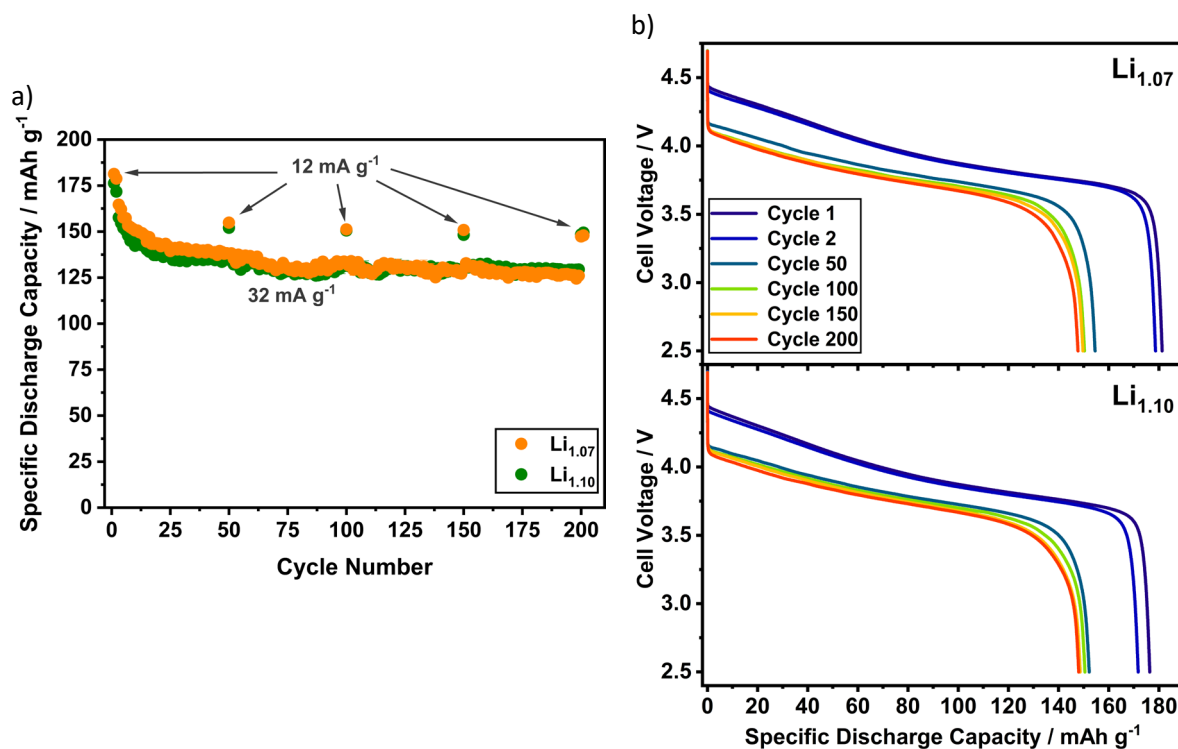

**Figure S8.** Long-term cycling performance of Li<sub>1.07</sub> and Li<sub>1.10</sub> at RT (2.5 - 4.7 V): a) Specific discharge capacities and b) discharge voltage profiles of cycles with lower discharge current (12 mA g<sup>-1</sup>). The small fluctuation of the data points in a) is related to slight variations of the room temperature.

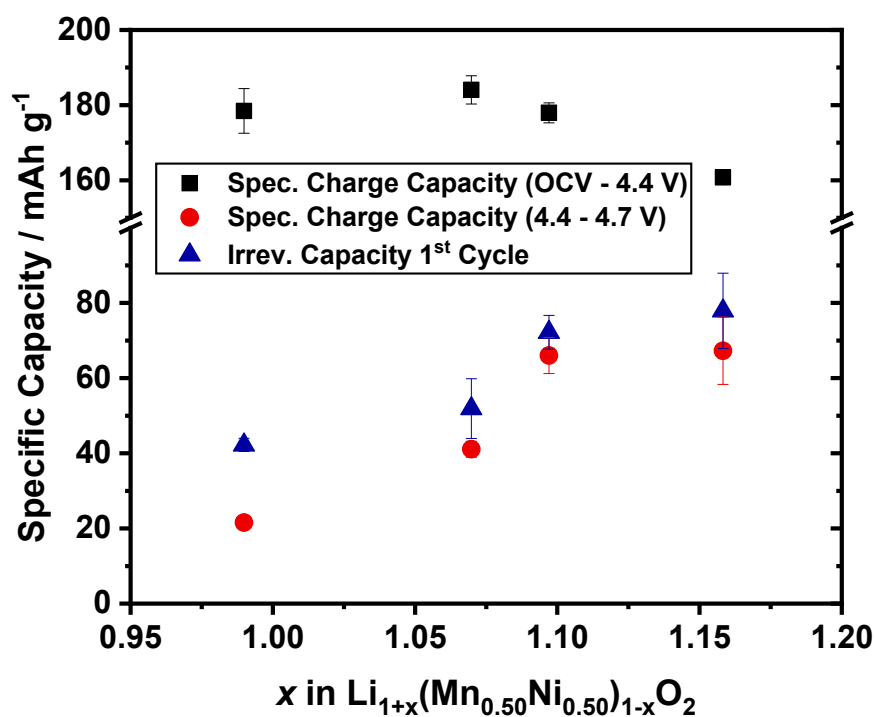

**Figure S9.** Electrochemical analysis of the 1<sup>st</sup> cycle specific capacity behavior in different voltage ranges: OCV - 4.4 V (black) and 4.4 - 4.7 V (red) as well as the irreversible initial capacity loss. The given numbers are mean values of three cells.

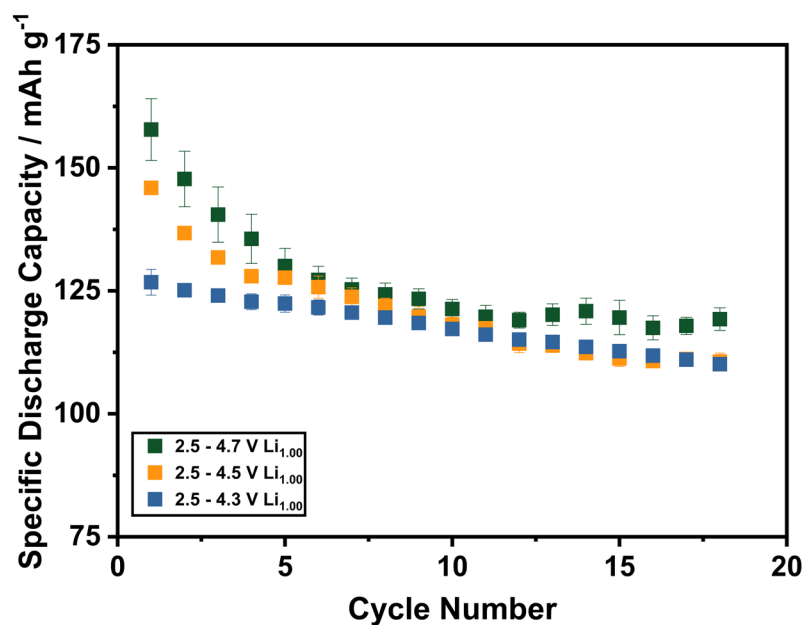

**Figure S10.** Comparison of the discharge capacity development during cycling ( $12 \text{ mA g}^{-1}$ ) of  $\text{Li}_{1.00}$  using different upper cut-off voltages: 4.3 V (blue), 4.5 V (yellow) and 4.7 V (green).

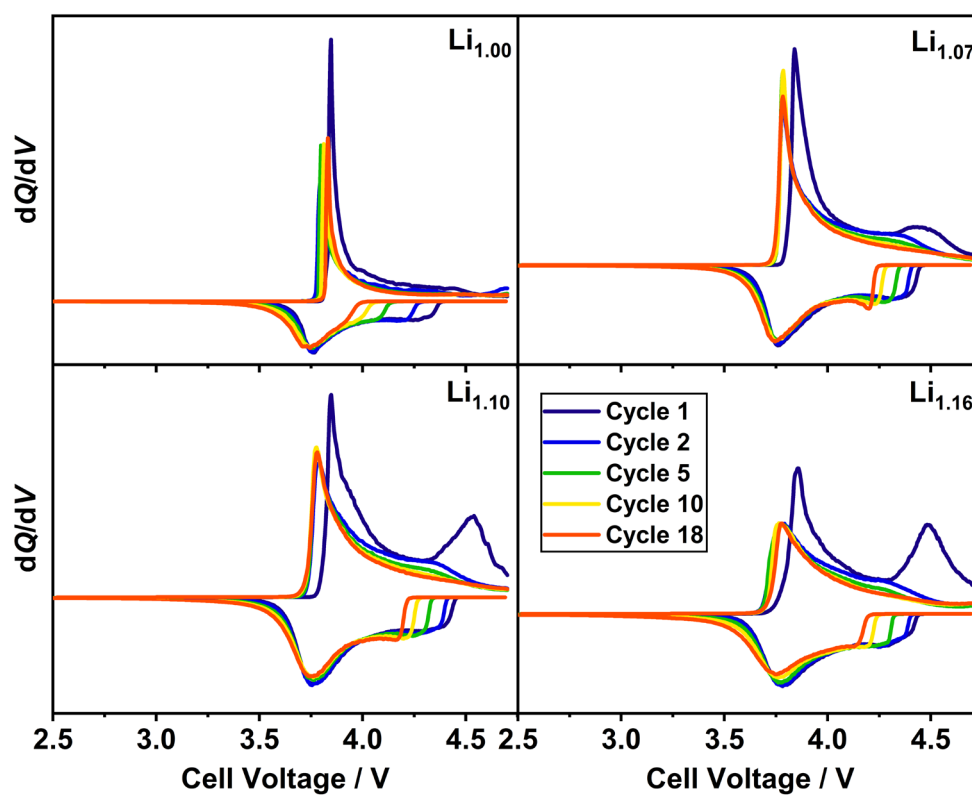

**Figure S11.** Electrochemical characterization of  $\text{Li}_{1.00}$ ,  $\text{Li}_{1.07}$ ,  $\text{Li}_{1.10}$  and  $\text{Li}_{1.16}$  during the initial cycles ( $12 \text{ mA g}^{-1}$ ): supplementary  $dQ/dV$  plots of the cycling data presented in Figure 9.



## References

- 1 J. Bréger, Y. S. Meng, Y. Hinuma, S. Kumar, K. Kang, Y. Shao-Horn, G. Ceder and C. P. Grey, *Chem. Mater.*, 2006, **18**, 4768.
- 2 P. Skemer, I. Katayama, Z. Jiang and S. Karato, *Tectonophysics*, 2005, **411**, 157.
